# Supplementary material for: Rapid identification of the short-lived intermediates in alternating-current electrolysis by mass spectrometry
Source: Royal Society of Chemistry journal article supplement (doi:10.1039/d2cc04363g), 2022-01-01
Supplement: d2cc04363g1.pdf [file d2cc04363g1.pdf]

*Supporting Information*

**Rapid Identification of Short-lived Intermediates in Alternating-  
Current Electrolysis by Mass Spectrometry**

Xiao-Jun Xi, Jun Hu,\* Hong-Yuan Chen, Jing-Juan Xu\*

State Key Laboratory of Analytical Chemistry for Life Science, School of Chemistry and Chemical Engineering, Nanjing University, Nanjing 210023, P. R. China

\* Corresponding Author(s): [njuchemhj@126.com](mailto:njuchemhj@126.com) (J. Hu); [xujj@nju.edu.cn](mailto:xujj@nju.edu.cn) (J.J. Xu)

**Table of Contents**

**1. Experimental**

1.1 Chemicals

1.2 Fabrication and characterization of the bare and BPE-decorated quartz micropipettes

[Figures S1-S2](#)

1.3 Mass spectrometry

[Figures S3-S11](#)

[Tables S1-S3](#)

## 1. Experimental

### 1.1 Chemicals

N-tosyl-2-methyl-4-methoxyaniline (**1**, 98%) was purchased from Nanjing Yanchuang Pharmaceutical Technology Corporation (Nanjing, Jiangsu, China). Ethylene glycol (EG, > 99% (GC)), Acetonitrile (ACN,  $\geq 99.9\%$ ), 2,2,6,6-Tetramethyl-1-piperidinyloxy (TEMPO, 98%) and Tris(2,2'-bipyridine)dichlororuthenium(II) hexahydrate ( $\text{Ru}(\text{bpy})_3\text{Cl}_2 \cdot 6\text{H}_2\text{O}$ , 98%) were obtained from Shanghai Aladdin Biochemical Technology Co.,Ltd. (Shanghai, China). Pure water was purchased from Wahaha Company (Hangzhou, Zhejiang, China).

### 1.2 Fabrication and characterization of the bare and BPE-decorated quartz micropipettes

A bare micropipette was fabricated from a quartz capillary (QF100-70-7.5, Sutter Instrument, Novato, CA) using a laser-based P-2000 pipette puller (Sutter Instrument Co., Novato, CA, USA). The parameters to fabricate micropipette with a  $\sim 1 \mu\text{m}$  opening are as follows:

Line 1: HEAT:690, FIL:2, VEL:28, DEL:128, PUL:70;

Line 2: HEAT:690, FIL:2, VEL:28, DEL:128, PUL:110.

For carbon deposit decoration, the previously reported method of butane pyrolysis was used with some minor modification. In brief, As shown in [Figure S1](#), a butane gas ( $\sim 10 \text{ mL min}^{-1}$ ) was passed through a bare micropipette from its rear and heated by butane flame under a nitrogen atmosphere ( $\sim 150 \text{ mL min}^{-1}$  through an outer quartz tube of O.D. 3.0 mm and I.D. 1.5mm). The temperature inside the tube was maintained at  $700 - 800 \text{ }^\circ\text{C}$  for about for 5 min, so that the desired thickness of the carbon layer ( $\sim 89 \text{ nm}$ ) could be obtained by butane pyrolysis. A combined energy dispersive X-ray spectroscopy (EDX) and elements mapping analysis system attached to the SEM (SM-7800F, JEOL Ltd., Japan) were used for characterizing the hollow structure of a bipolar electrode integrated micropipette (see [Figure S2](#)), with a thin layer of Au (about 5 nm) sputtered.

### 1.3 Mass spectrometry

All mass spectra were obtained using a Q-TOF mass spectrometer (6530B, Agilent Technologies, Inc., Santa Clara, U.S.A.) with a data acquisition rate of 1 Hz in positive mode. The emitter was placed in front of the MS inset with a distance about 5 mm. Instrumental parameters for acquiring MS spectra were as follows: gas temp =  $300 \text{ }^\circ\text{C}$ , drying gas =  $1.5 \text{ V/min}$ , nebulizer = 0 psig, Vcap = 0 kV, respectively. The AC high voltage was generated by a function/arbitrary waveform generator (Rigol, DG1022U), which was then amplified by a signal amplifier (Aigtek, ATA-7020). Tandem mass spectra ([Figures S4-S11](#)) were obtained under a collision energy of 0-5 eV, using a widow of 0.7 Da for the isolation of the parent ions. The theoretical isotopic distributions were calculated using the Isotopic Distribution Calculator (Release B633.0 Agilent).

## Figures and Tables

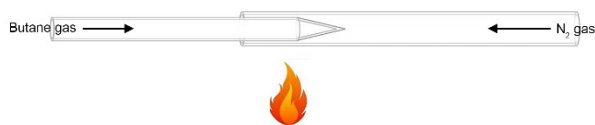

Figure S1. Schematic illustration of BPE integration by butane pyrolysis.

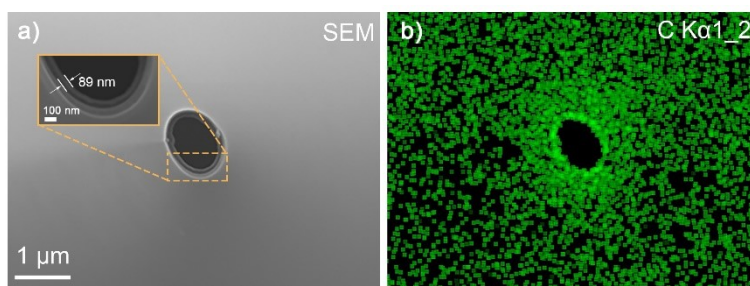

Figure S2. (a) SEM image of a carbon deposited quartz micropipette (top view) and (b) its elemental (carbon) mapping.

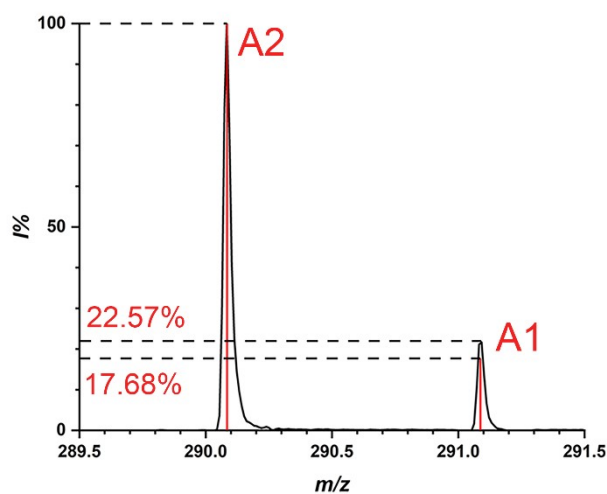

Figure S3. Detection of the electrogenerated **A1** and **A2** under AC electrolysis. The red drop line showed the theoretical isotopic distribution of **A2** ion. Given the theoretical isotopic distribution of **A2** ( $[\text{C}_{15}\text{H}_{16}\text{NO}_3\text{S}]^+$ ,  $m/z$  290.0845, 100%;  $m/z$  291.0876, 17.68%;  $m/z$  292.0835, 6.56%;  $m/z$  293.0854, 0.94%) and **A1** ( $[\text{C}_{15}\text{H}_{17}\text{NO}_3\text{S}]^+$ ,  $m/z$  291.0924, 100%;  $m/z$  292.0955, 17.69%;  $m/z$  293.0913, 6.56%;  $m/z$  294.0932, 0.94%) as well as their measure relative intensity, the expected mass at around  $m/z$  291 should be 291.0886 (namely  $291.0876 \times (17.68/22.57) + 291.0924 \times (1 - 17.68/22.57) = 291.0886$ ).

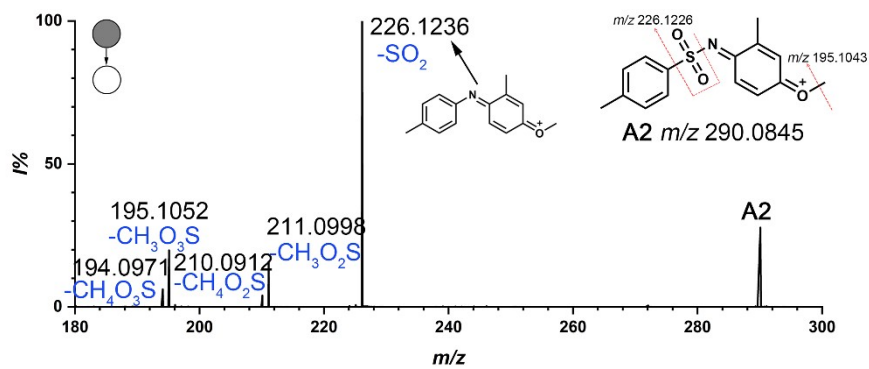

Figure S4. Tandem mass spectra of **A2**. CID energy: 1 eV.

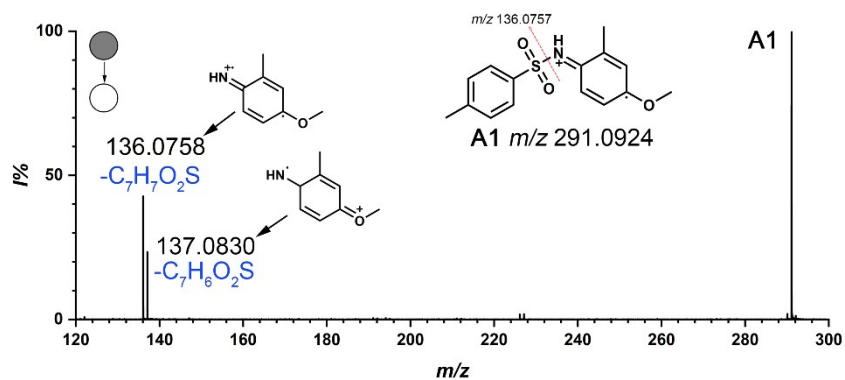

Figure S5. Tandem mass spectra of **A1**. CID energy: 5 eV.

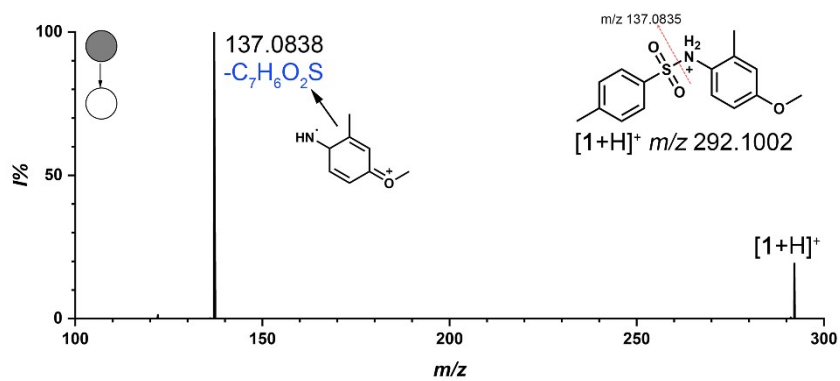

Figure S6. Tandem mass spectra of  $H^+$  adducted **1**. CID energy: 0 eV.

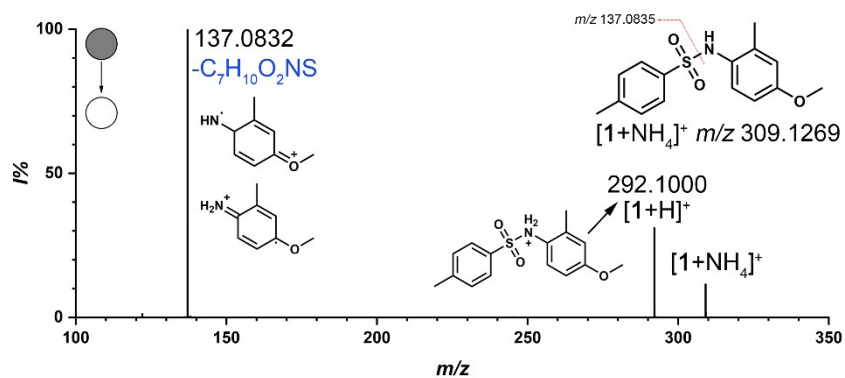

Figure S7. Tandem mass spectra of  $\text{NH}_4^+$  adducted **1**. CID energy: 3 eV.

Table S1. Fragmentation ions from **A2**, **A1**,  $\text{H}^+$  adducted **1** and  $\text{NH}_4^+$  adducted **1**.

| NO. | Measured Mass | Calculated Mass | $\Delta m$ (mDa) | Chemical Formula                                    | Chemical Structure |
|-----|---------------|-----------------|------------------|-----------------------------------------------------|--------------------|
| 1   | 292.1000      | 292.1002        | -0.2             | $[\text{C}_{15}\text{H}_{18}\text{NO}_3\text{S}]^+$ |                    |
| 2   | 226.1236      | 226.1226        | 1.0              | $[\text{C}_{15}\text{H}_{16}\text{NO}]^+$           |                    |
| 3   | 211.0998      | 211.0992        | 0.7              | $[\text{C}_{14}\text{H}_{13}\text{NO}]^+$           |                    |
| 4   | 210.0912      | 210.0913        | -0.1             | $[\text{C}_{14}\text{H}_{12}\text{NO}]^+$           |                    |
| 5   | 195.1052      | 195.1043        | 0.9              | $[\text{C}_{14}\text{H}_{13}\text{N}]^+$            |                    |
| 6   | 194.0971      | 194.0964        | 0.7              | $[\text{C}_{14}\text{H}_{12}\text{N}]^+$            |                    |
| 7   | 137.0830      |                 | -0.5             | $[\text{C}_8\text{H}_{11}\text{NO}]^+$              |                    |
|     | 137.0838      | 137.0835        | 0.3              |                                                     |                    |
|     | 137.0832      |                 | -0.3             |                                                     |                    |
| 8   | 136.0758      | 136.0757        | 0.1              | $[\text{C}_8\text{H}_{10}\text{NO}]^+$              |                    |

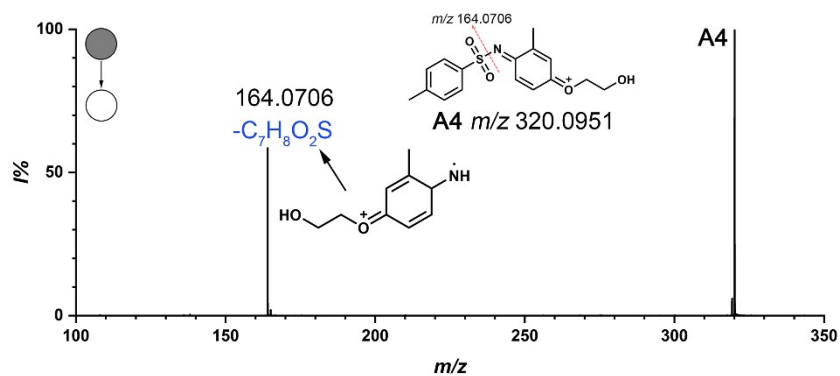

Figure S8. Tandem mass spectra of **A4**. CID energy: 0 eV.

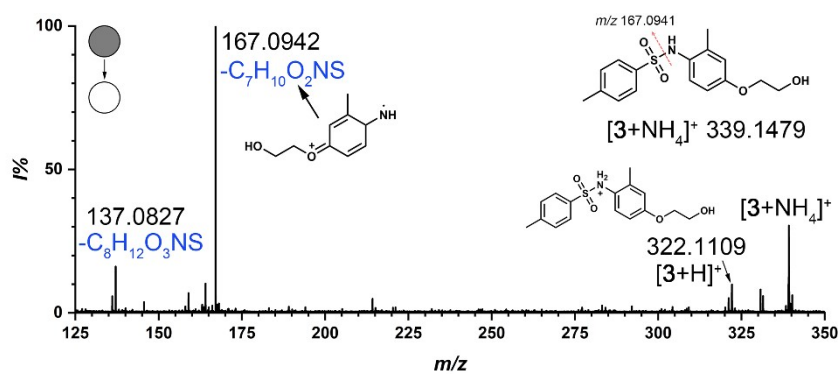

Figure S9. Tandem mass spectra of  $\text{NH}_4^+$  adducted **3**. CID energy: 0 eV.

Table S2. Fragmentation ions from **A4** and  $\text{NH}_4^+$  adducted **3**.

| NO. | Measured Mass | Calculated Mass | $\Delta m$ (mDa) | Chemical Formula                                    | Chemical Structure |
|-----|---------------|-----------------|------------------|-----------------------------------------------------|--------------------|
| 1   | 322.1109      | 322.1108        | 0.1              | $[\text{C}_{16}\text{H}_{20}\text{NO}_4\text{S}]^+$ |                    |
| 2   | 167.0942      | 167.0941        | 0.1              | $[\text{C}_{15}\text{H}_{18}\text{NO}_3\text{S}]^+$ |                    |
| 3   | 164.0706      | 164.0706        | 0.0              | $[\text{C}_{15}\text{H}_{16}\text{NO}]^+$           |                    |
| 4   | 137.0827      | 137.0835        | -0.8             | $[\text{C}_{14}\text{H}_{13}\text{NO}]^+$           |                    |

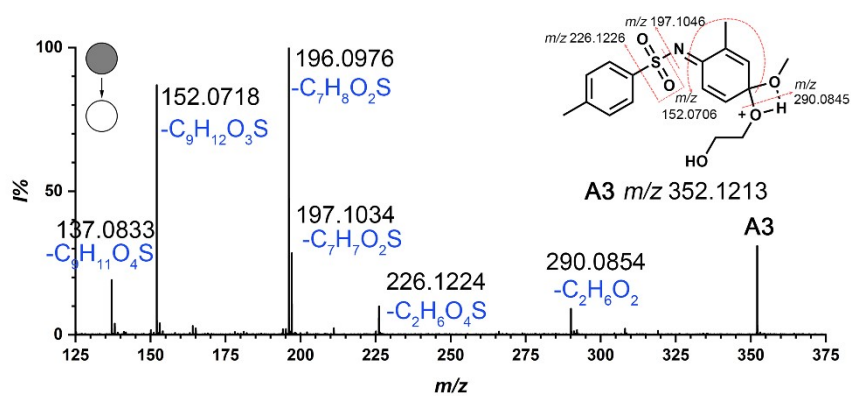

Fig. S10 Tandem mass spectra of **A3**. CID energy: 0 eV.

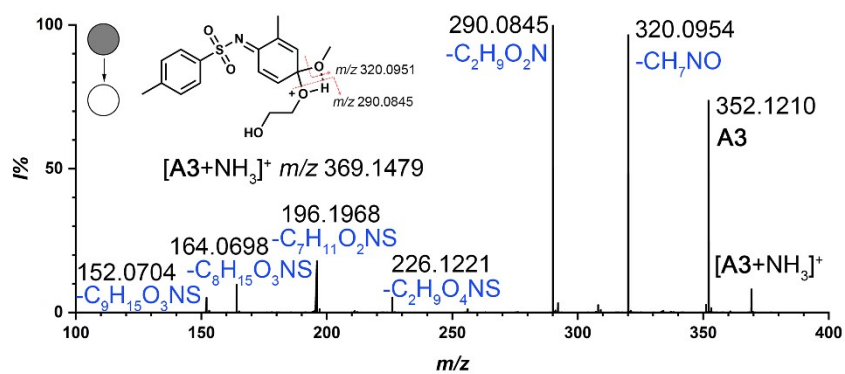

Figure S11. Tandem mass spectra of  $NH_4^+$  adducted **A3**. CID energy: 0 eV.

Table S3. Fragmentation ions from **A3** and  $\text{NH}_4^+$  adducted **A3**.

| NO. | Measured Mass        | Calculated Mass | $\Delta m$ (mDa) | Chemical Formula                                    | Chemical Structure                                                                    |
|-----|----------------------|-----------------|------------------|-----------------------------------------------------|---------------------------------------------------------------------------------------|
| 1   | 352.1210             | 352.1213        | -0.3             | $[\text{C}_{17}\text{H}_{22}\text{NO}_5\text{S}]^+$ | 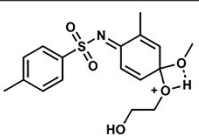   |
| 2   | 320.0954             | 320.0951        | 0.3              | $[\text{C}_{16}\text{H}_{18}\text{N}_4\text{O}]^+$  |     |
| 3   | 290.0854<br>290.0845 | 290.0845        | 0.9<br>0.0       | $[\text{C}_{15}\text{H}_{16}\text{NO}_3\text{S}]^+$ |    |
| 4   | 226.1224<br>226.1221 | 226.1226        | -0.2<br>-0.5     | $[\text{C}_{15}\text{H}_{16}\text{NO}]^+$           |    |
| 5   | 197.1034             | 197.1046        | -1.2             | $[\text{C}_{10}\text{H}_{15}\text{NO}_3]^+$         |    |
| 6   | 196.0976<br>196.0968 | 196.0968        | 0.8<br>0.0       | $[\text{C}_{10}\text{H}_{14}\text{NO}_3]^+$         |   |
| 7   | 164.0698             | 164.0706        | -0.8             | $[\text{C}_9\text{H}_{10}\text{NO}_2]^+$            |  |
| 8   | 152.0718<br>152.0704 | 152.0706        | 1.2<br>-0.2      | $[\text{C}_8\text{H}_{10}\text{NO}_2]^+$            |  |
| 9   | 137.0822             | 137.0835        | -1.3             | $[\text{C}_{14}\text{H}_{13}\text{NO}]^+$           |  |
